# Supplementary material
Source: ML conference proceedings conference paper supplement (https://openaccess.thecvf.com/content/CVPR2023/html/Piccinelli_iDisc_Internal_Discretization_CVPR_2023_paper.html)
Supplement: Supplementary file 2 [file Piccinelli_iDisc_Internal_Discretization_CVPR_2023_supplemental.zip]

Archive with 2 entries (2 files):
- iDisc_pcds.mp4
- iDisc_supp_CVPR2023.pdf
